# Supplementary material for: Human PMSCs-derived small extracellular vesicles alleviate neuropathic pain through miR-26a-5p/Wnt5a in SNI mice model
Source: PubMed Central journal article supplement (PMC9450435; doi:10.1186/s12974-022-02578-9), 2022-09-07

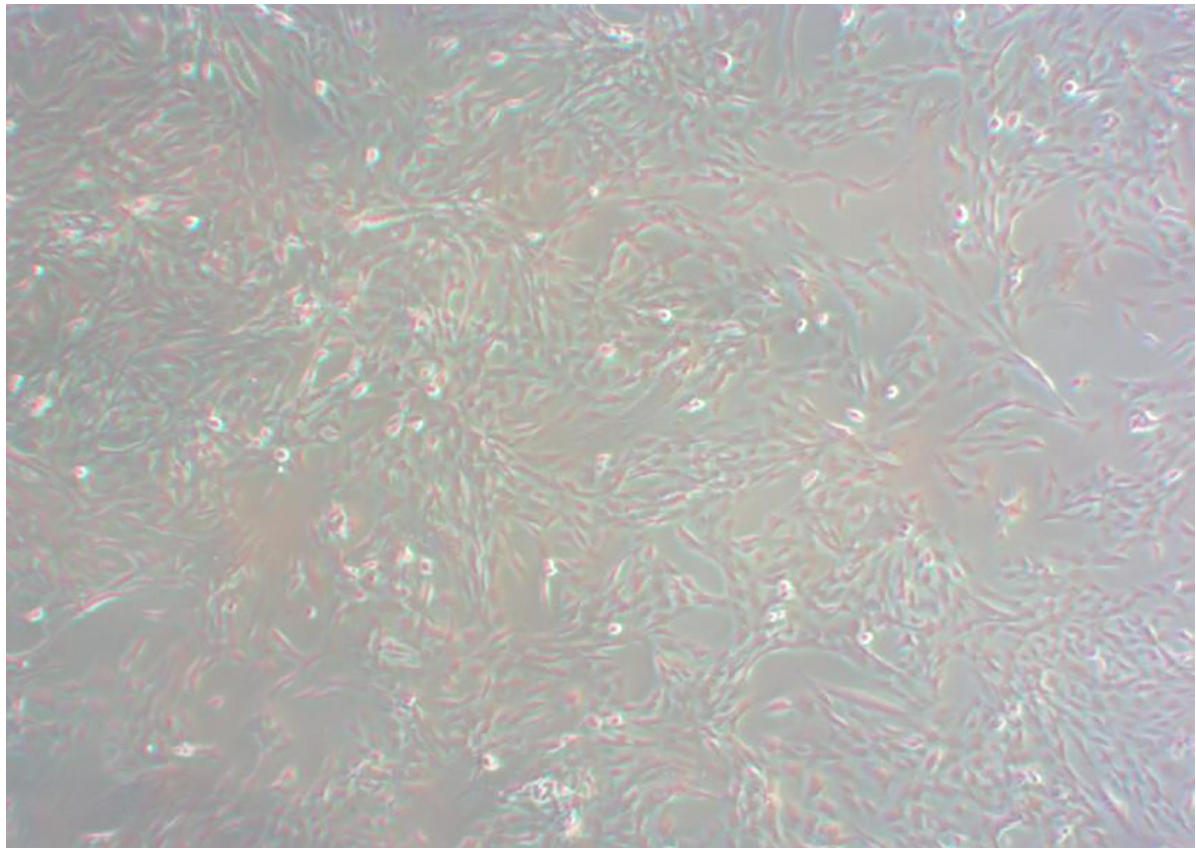

Supplement: 12974_2022_2578_MOESM1_ESM.pdf [file 12974_2022_2578_MOESM1_ESM.pdf]
